# Supplementary material for: The provision of clear aligner treatment by general dental practitioners in England: a mixed-methods study
Source: Research Square preprint supplement (doi:10.21203/rs.3.rs-7509774/v1), 2025-09-17
Supplement: Supplementary file 1 [file 02bddbd40d0e2fed77959d4f.docx]

**SUPPLEMENTARY MATERIAL**

**Table 1.** Clear aligner training: the length of training and perceived usefulness (n= 100)

| **Domains** | **Answers** | **1-10 years qualified**  **(n=45)** | **>10 years qualified**  **(n=55)** |
| --- | --- | --- | --- |
| **1. Completion of an aligner certification** | **Yes** | 37 | 49 |
| **No** | 8 | 6 |
| **2.Duration of the certification course** | **Not attended (0 days)** | 7 | 6 |
| **1 day** | 21 | 21 |
| **2-4 days** | 13 | 22 |
| **Other (>4 days)** | 4 | 6 |
| **3.Perceived usefulness:**  **Theoretical background/understanding** | **Strongly agree** | 1 | 3 |
| **Agree** | 12 | 15 |
| **Neutral** | 19 | 15 |
| **Disagree** | 7 | 12 |
| **Strongly disagree** | 6 | 10 |
| **Clinical techniques** | **Strongly agree** | 1 | 5 |
| **Agree** | 14 | 9 |
| **Neutral** | 16 | 21 |
| **Disagree** | 8 | 11 |
| **Strongly disagree** | 6 | 9 |
| **Use of auxiliaries** | **Strongly agree** | 3 | 20 |
| **Agree** | 12 | 1 |
| **Neutral** | 17 | 13 |
| **Disagree** | 9 | 12 |
| **Strongly disagree** | 4 | 9 |
| **Performing IPR** | **Strongly agree** | 0 | 3 |
| **Agree** | 13 | 15 |
| **Neutral** | 20 | 17 |
| **Disagree** | 5 | 14 |
| **Strongly disagree** | 7 | 6 |
| **Case selection** | **Strongly agree** | 4 | 3 |
| **Agree** | 12 | 14 |
| **Neutral** | 17 | 21 |
| **Disagree** | 7 | 8 |
| **Strongly disagree** | 5 | 9 |
| **Trouble-shooting** | **Strongly agree** | 4 | 3 |
| **Agree** | 10 | 15 |
| **Neutral** | 20 | 22 |
| **Disagree** | 8 | 5 |
| **Strongly disagree** | 3 | 10 |
| **Patient monitoring** | **Strongly agree** | 2 | 3 |
| **Agree** | 11 | 13 |
| **Neutral** | 16 | 22 |
| **Disagree** | 12 | 9 |
| **Strongly disagree** | 4 | 8 |
| **Pricing structure** | **Strongly agree** | 3 | 4 |
| **Agree** | 8 | 12 |
| **Neutral** | 20 | 23 |
| **Disagree** | 13 | 10 |
| **Strongly disagree** | 8 | 6 |
| **4.Beneficence of further training: Theoretical background/understanding** | **Yes** | 36 | 35 |
| **No** | 9 | 20 |
| **Clinical techniques** | **Yes** | 34 | 41 |
| **No** | 11 | 14 |
| **Performing IPR** | **Yes** | 25 | 25 |
| **No** | 20 | 30 |
| **Use of auxiliaries** | **Yes** | 36 | 47 |
| **No** | 9 | 8 |
| **Case selection** | **Yes** | 39 | 42 |
| **No** | 6 | 13 |
| **Trouble-shooting** | **Yes** | 37 | 45 |
| **No** | 8 | 10 |
| **Patient monitoring** | **Yes** | 27 | 38 |
| **No** | 18 | 17 |
| **Patient marketing** | **Yes** | 28 | 30 |
| **No** | 17 | 25 |
| **Pricing structure** | **Yes** | 25 | 30 |
| **No** | 20 | 25 |

**Table 2.** Key features of CAT training courses

| **Theme: Key features** | **Characteristics** | **Quotations** |
| --- | --- | --- |
| **Sub-themes** |  |  |
| **Online learning mode** | - Flexibility and autonomy to optimally manage time and complete training to GDP’s schedule - Physical ease of being within GDP’s comfort zone - Embedded learning activities (e.g. webinar discussions and videos) offered opportunities to interact with specialist orthodontists, along with other trainees in a friendly and approachable environment; thus, enhancing learning and problem-solving skills as well as clinical skills. | *“It’s mainly evenings; the commodity of being at home in front of a cup of tea, it relaxes me…”* *(GDPF7, >10 years since qualification)*  *“(in the live 32Co webinars) You can ask more advanced questions, and you’re going to get a really good answer” (GDPM3, >10 years since qualification)* |
| **Training duration** | - Duration of online courses e.g. 32Co were adequate allowing continual in-depth learning and more comprehensive coverage of subjects - Duration of face-to-face courses were of short duration with GDPs expressing a desire for an extended period. | *“It would be better if it (face-to-face training course) would be longer...” (GDPF12, >10 years since qualification)* |
| **Content** | - “Hands-on” experience that was delivered in both face-to-face and in some online courses in which a typodont model was sent to the participants for practising placing auxiliaries at home, was referred to as the main contributing factor to improving their confidence and clinical skills in CAT provision. - The content of some short training courses appeared to be “basic” by GDPs more than 10 years qualified, contributing little to their knowledge of CAT provision. | *“...More confident in using the appliances, using the buttons, placing the composite retainers, you felt better that you actually had it hands-on course as well, you felt a bit more confident going away...” (GDPF4, >10 years since qualification)*  *“After the day I didn’t really know much more about clear aligners, although I was given the certificate to start, didn’t really know what I was doing” (GDPM15, <10 years since qualification)* |
| **Training facilitators** | - Higher preference for highly qualified specialists in orthodontics; this feature had a positive impact on their learning process and motivation. | *“The specialist that was presenting on the webinars, that has got significant orthodontic experience, was a real bonus, because you can ask really simple, stupid questions, and you know you’re going to get a really good answer” (GDPM3, >10 years since qualification)* |
| **Cost** | - Perceived high cost of courses seen as the largest barrier to registration; whereas “free of charge” courses led by specialists, could enhance registration. | *“I think the cost of a lot of the postgraduate certificates is significant. I think they're all more than £10,000.00 plus you've got to factor in all the lost clinical time that goes with it ” (GDPM1, >10 years since qualification)* |
| **Access to appropriate learner-support elements** | - Educational resources - Ongoing network support facilitating fruitful discussions with mentors and enabling learning. | *“Being able to chat with the course leads every week, was definitely beneficial, because it actually tested my understanding rather than just aimlessly taking on more course information”* *(GDPF5, <10 years since qualification)* |

**Table 3.** Clear aligner treatment experience (n = 100)

| **Domains** | **Answers** | **1-10 years qualified**  **(n=45)** | **>10 years qualified**  **(n=55)** |
| --- | --- | --- | --- |
| **1.Number of CAT cases undertaken** | **1-10** | 24 | 9 |
| **11-50** | 18 | 34 |
| **>50** | 3 | 12 |
| **2.Number of CAT cases undertaken in the past year** | **1-10** | 39 | 39 |
| **11-50** | 6 | 16 |
| **>50** | 0 | 0 |
| **3.Provision of CAT to adults** | **Yes** | 45 | 55 |
| **No** | 0 | 0 |
| **4.Provision of CAT to teenagers** | **Yes** | 13 | 20 |
| **No** | 32 | 35 |
| **5.Influence on the decision of CAT provision: Patient Preference / Request** | **Strongly agree** | 17 | 22 |
| **Agree** | 21 | 24 |
| **Neutral** | 6 | 7 |
| **Disagree** | 1 | 1 |
| **Strongly disagree** | 0 | 1 |
| **Patient Expectations** | **Strongly agree** | 15 | 21 |
| **Agree** | 25 | 27 |
| **Neutral** | 5 | 6 |
| **Disagree** | 0 | 1 |
| **Strongly disagree** | 0 | 0 |
| **Case Complexity (type of tooth movements needed)** | **Strongly agree** | 25 | 24 |
| **Agree** | 14 | 21 |
| **Neutral** | 5 | 9 |
| **Disagree** | 0 | 1 |
| **Strongly disagree** | 1 | 0 |
| **Anticipated Patient Compliance** | **Strongly agree** | 14 | 23 |
| **Agree** | 23 | 24 |
| **Neutral** | 8 | 6 |
| **Disagree** | 0 | 2 |
| **Strongly disagree** | 0 | 0 |
| **Cost** | **Strongly agree** | 13 | 17 |
| **Agree** | 20 | 21 |
| **Neutral** | 9 | 12 |
| **Disagree** | 3 | 4 |
| **Strongly disagree** | 0 | 1 |

**Table 4.** Defining case selection for aligner treatment (n= 100)

| **Domains** | **Answers** | **1-10 years qualified**  **(n=45)** | **>10 years qualified**  **(n=55)** |
| --- | --- | --- | --- |
| **1.Features of malocclusion comfortable to treat with aligners** | **Mild crowding (1-4mm)** | 43 | 49 |
| **Moderate crowding (4.1-8mm)** | 39 | 46 |
| **Severe crowding (more than 8mm)** | 9 | 5 |
| **Spaced dentition** | 33 | 40 |
| **Simple tooth (tipping) movements** | 43 | 51 |
| **Mild antero-posterior (class II or III) correction** | 28 | 37 |
| **Severe antero-posterior (class II or III) correction** | 3 | 0 |
| **Rotational tooth correction** | 30 | 33 |
| **Deep overbite correction** | 15 | 21 |
| **Open bite correction** | 17 | 14 |
| **Cross-bite correction (2-4 teeth)** | 24 | 28 |
| **Bilateral cross-bite correction** | 5 | 6 |
| **2.Features of malocclusion NOT comfortable to treat with aligners** | **Mild crowding (1-4mm)** | 0 | 1 |
| **Moderate crowding (4.1-8mm)** | 0 | 4 |
| **Severe crowding (more than 8mm)** | 31 | 37 |
| **Spaced dentition** | 3 | 9 |
| **Simple tooth (tipping) movements** | 0 | 2 |
| **Mild antero-posterior (class II or III) correction** | 5 | 10 |
| **Severe antero-posterior (class II or III) correction** | 41 | 48 |
| **Rotational tooth correction** | 9 | 15 |
| **Deep overbite correction** | 29 | 30 |
| **Open bite correction** | 22 | 36 |
| **Cross-bite correction (2-4 teeth)** | 17 | 18 |
| **Bilateral cross-bite correction** | 36 | 45 |
| **3.Confidence with dental extractions as part of CAT** | **Comfortable** | 24 | 28 |
| **Not comfortable** | 21 | 27 |
| **4.Preferred choice of teeth extractions in CAT** | **Lower incisors** | 16 | 26 |
| **Premolars** | 29 | 29 |
| **Molars** | 0 | 0 |

**Table 5.** Treatment planning in clear aligner therapy (n= 100)

| **Domains** | **Answers** | **1-10 years qualified**  **(n=45)** | **>10 years qualified**  **(n=55)** |
| --- | --- | --- | --- |
| **1.Method of recording teeth** | **Impression-based** | 9 | 18 |
| **Digital scanning** | 36 | 37 |
| **2.Name of digital scanner used in CAT** | **Itero** | 18 | 19 |
| **Medit** | 7 | 10 |
| **Trios/ 3Shape** | 17 | 14 |
| **Carestream** | 1 | 1 |
| **Primescan** | 2 | 2 |
| **Other** | 2 | 1 |
| **3.Confidence in undertaking digital scanning** | **Very comfortable** | 37 | 35 |
| **Not comfortable** | 3 | 10 |
| **Not using digital scans** | 5 | 10 |
| **4.Confidence with the planning software** | **Very comfortable** | 28 | 29 |
| **Not comfortable** | 17 | 26 |
| **5.Percentage of approved digital plans without any changes** | **0** | 12 | 13 |
| **1** | 1 | 3 |
| **2** | 3 | 1 |
| **3** | 1 | 3 |
| **4** | 0 | 3 |
| **5** | 8 | 5 |
| **6** | 2 | 2 |
| **7** | 5 | 3 |
| **8** | 5 | 11 |
| **9** | 2 | 7 |
| **10** | 6 | 4 |
| **6.Number of changes in proposed treatment plan before accepting it** | **0** | 7 | 5 |
| **1-2** | 30 | 37 |
| **3-4** | 7 | 11 |
| **>5** | 1 | 2 |
| **7.Aspects of change in the proposed digital plan: Attachments** | **Always** | 3 | 6 |
| **Frequently** | 10 | 9 |
| **Sometimes** | 9 | 14 |
| **Rarely** | 13 | 16 |
| **Never** | 10 | 10 |
| **IPR** | **Always** | 2 | 7 |
| **Frequently** | 10 | 12 |
| **Sometimes** | 16 | 18 |
| **Rarely** | 10 | 11 |
| **Never** | 7 | 7 |
| **Tooth movements** | **Always** | 0 | 9 |
| **Frequently** | 16 | 11 |
| **Sometimes** | 16 | 20 |
| **Rarely** | 8 | 12 |
| **Never** | 5 | 3 |
| **Final tooth position** | **Always** | 3 | 8 |
| **Frequently** | 11 | 15 |
| **Sometimes** | 21 | 19 |
| **Rarely** | 4 | 10 |
| **Never** | 6 | 3 |
| **Use of auxiliaries** | **Always** | 0 | 3 |
| **Frequently** | 4 | 2 |
| **Sometimes** | 8 | 14 |
| **Rarely** | 18 | 15 |
| **Never** | 15 | 21 |


**Table 6.** Factors influencing the choice of CAT provider (n= 100)

| **Domains** | **Answers** | **1-10 years qualified**  **(n=45)** | **>10 years qualified**  **(n=55)** |
| --- | --- | --- | --- |
| **1.Preferred choice of CAT provider(s)** | **Invisalign** | 28 | 37 |
| **Clear correct** | 6 | 8 |
| **Sure Smile** | 2 | 4 |
| **Spark** | 0 | 3 |
| **In-House** | 1 | 2 |
| **Other** | 13 | 17 |
| **2.Factors influencing choice of CAT provider: Ease of use of software planning tool** | **Strongly agree** | 23 | 31 |
| **Agree** | 18 | 19 |
| **Neutral** | 3 | 4 |
| **Disagree** | 1 | 1 |
| **Strongly disagree** | 0 | 0 |
| **Level of technical support available** | **Strongly agree** | 31 | 29 |
| **Agree** | 11 | 22 |
| **Neutral** | 1 | 2 |
| **Disagree** | 2 | 2 |
| **Strongly disagree** | 0 | 0 |
| **Level of clinical support available** | **Strongly agree** | 35 | 37 |
| **Agree** | 7 | 16 |
| **Neutral** | 1 | 1 |
| **Disagree** | 2 | 1 |
| **Strongly disagree** | 0 | 0 |
| **Help with troubleshooting** | **Strongly agree** | 29 | 33 |
| **Agree** | 9 | 16 |
| **Neutral** | 5 | 5 |
| **Disagree** | 2 | 1 |
| **Strongly disagree** | 0 | 0 |
| **Cost** | **Strongly agree** | 23 | 22 |
| **Agree** | 15 | 21 |
| **Neutral** | 1 | 10 |
| **Disagree** | 6 | 2 |
| **Strongly disagree** | 0 | 0 |
| **Reliability in the proposed treatment plan** | **Strongly agree** | 32 | 38 |
| **Agree** | 10 | 16 |
| **Neutral** | 1 | 1 |
| **Disagree** | 2 | 0 |
| **Strongly disagree** | 0 | 0 |
| **Marketing of the aligner brand** | **Strongly agree** | 10 | 13 |
| **Agree** | 23 | 22 |
| **Neutral** | 10 | 17 |
| **Disagree** | 2 | 2 |
| **Strongly disagree** | 0 | 1 |
| **Quality of the aligners provided** | **Strongly agree** | 31 | 33 |
| **Agree** | 11 | 20 |
| **Neutral** | 1 | 2 |
| **Disagree** | 2 | 0 |
| **Strongly disagree** | 0 | 0 |
| **Reported patient satisfaction** | **Strongly agree** | 24 | 29 |
| **Agree** | 14 | 21 |
| **Neutral** | 5 | 3 |
| **Disagree** | 2 | 2 |
| **Strongly disagree** | 0 | 0 |
| **On-going clinical training resources** | **Strongly agree** | 29 | 28 |
| **Agree** | 11 | 23 |
| **Neutral** | 3 | 2 |
| **Disagree** | 2 | 2 |
| **Strongly disagree** | 0 | 0 |
| **Access to education resource content** | **Strongly agree** | 30 | 31 |
| **Agree** | 10 | 20 |
| **Neutral** | 5 | 2 |
| **Disagree** | 0 | 2 |
| **Strongly disagree** | 0 | 0 |
| **Access to marketing material / resource** | **Strongly agree** | 20 | 19 |
| **Agree** | 17 | 24 |
| **Neutral** | 7 | 8 |
| **Disagree** | 1 | 2 |
| **Strongly disagree** | 0 | 2 |

**Table 7.** Treatment mechanics in CAT (n= 100)

| **Domains** | **Answers** | **1-10 years qualified**  **(n=45)** | **>10 years qualified**  **(n=55)** |
| --- | --- | --- | --- |
| **1.Attachment placement** | **Yes** | 42 | 55 |
| **No** | 3 | 0 |
| **2.IPR performance** | **Yes** | 44 | 54 |
| **No** | 1 | 1 |
| **3.Elastics usage** | **Yes** | 21 | 31 |
| **No** | 24 | 24 |
| **4.Buttons placement for elastic usage** | **Yes** | 20 | 36 |
| **No** | 25 | 19 |
| **5.Anterior bite ramps/turbos usage** | **Yes** | 15 | 25 |
| **No** | 30 | 30 |
| **6.Posterior bite blocks usage** | **Yes** | 15 | 21 |
| **No** | 30 | 34 |
| **7.Undertaking IPR:**  **Reasons for undertaking IPR** | **Relief of dental crowding** | 45 | 55 |
| **Increased tooth stability** | 7 | 8 |
| **Reduce/eliminate Black triangles** | 41 | 50 |
| **Minimise arch expansion** | 27 | 30 |
| **Minimise incisor Proclination** | 26 | 37 |
| **Minimise risk of gingival recession** | 25 | 31 |
| **Address tooth-size discrepancy** | 17 | 34 |
| **Reduce overjet** | 19 | 25 |
| **Correct midline discrepancy** | 16 | 25 |
| **8.Undertaking prescribed IPR in the presence of rotations** | **Very comfortable** | 30 | 30 |
| **Not comfortable** | 15 | 25 |
| **9.Percentage of aligner cases prescribed for IPR** | **1-25%** | 0 | 1 |
| **26-75%** | 12 | 18 |
| **>75%** | 33 | 36 |
| **10.Other methods of space creation preference** | **Non-extraction alignment** | 26 | 28 |
| **Extraction therapy** | 21 | 26 |
| **Buccal arch expansion** | 33 | 45 |
| **Advancement of the incisors** | 19 | 30 |
| **Distalisation of the molars** | 13 | 14 |
| **Other** | 3 | 2 |
| **11.Preferred method for 0.1-0.2mm IPR** | **Single-sided strips (perforated)** | 26 | 27 |
| **Single-sided strips (solid)** | 15 | 23 |
| **Double-sided strips (perforated)** | 20 | 27 |
| **Double-sided strips (solid)** | 14 | 16 |
| **Interproximal Discs (perforated)** | 4 | 7 |
| **Interproximal Discs (solid)** | 2 | 3 |
| **High speed burs** | 3 | 12 |
| **12.Preferred method for 0.3-0.5mm IPR** | **Single-sided strips** | 20 | 24 |
| **Double-sided strips** | 34 | 35 |
| **Interproximal Discs** | 14 | 17 |
| **Burs** | 16 | 35 |
| **13.Staging IPR when undertaking 0.3-0.5mm** | **Yes** | 20 | 29 |
| **No** | 3 | 7 |
| **It depends** | 22 | 19 |

**Table 8.** Treatment mechanics in CAT (n= 100)

| **Domains** | **Answers** | **1-10 years qualified**  **(n=45)** | **>10 years qualified**  **(n=55)** |
| --- | --- | --- | --- |
| **1.Attachment placement** | **Yes** | 42 | 55 |
| **No** | 3 | 0 |
| **2.IPR performance** | **Yes** | 44 | 54 |
| **No** | 1 | 1 |
| **3.Elastics usage** | **Yes** | 21 | 31 |
| **No** | 24 | 24 |
| **4.Buttons placement for elastic usage** | **Yes** | 20 | 36 |
| **No** | 25 | 19 |
| **5.Anterior bite ramps/turbos usage** | **Yes** | 15 | 25 |
| **No** | 30 | 30 |
| **6.Posterior bite blocks usage** | **Yes** | 15 | 21 |
| **No** | 30 | 34 |
| **7.Undertaking IPR:**  **Reasons for undertaking IPR** | **Relief of dental crowding** | 45 | 55 |
| **Increased tooth stability** | 7 | 8 |
| **Reduce/eliminate Black triangles** | 41 | 50 |
| **Minimise arch expansion** | 27 | 30 |
| **Minimise incisor Proclination** | 26 | 37 |
| **Minimise risk of gingival recession** | 25 | 31 |
| **Address tooth-size discrepancy** | 17 | 34 |
| **Reduce overjet** | 19 | 25 |
| **Correct midline discrepancy** | 16 | 25 |
| **8.Undertaking prescribed IPR in the presence of rotations** | **Very comfortable** | 30 | 30 |
| **Not comfortable** | 15 | 25 |
| **9.Percentage of aligner cases prescribed for IPR** | **1-25%** | 0 | 1 |
| **26-75%** | 12 | 18 |
| **>75%** | 33 | 36 |
| **10.Other methods of space creation preference** | **Non-extraction alignment** | 26 | 28 |
| **Extraction therapy** | 21 | 26 |
| **Buccal arch expansion** | 33 | 45 |
| **Advancement of the incisors** | 19 | 30 |
| **Distalisation of the molars** | 13 | 14 |
| **Other** | 3 | 2 |
| **11.Preferred method for 0.1-0.2mm IPR** | **Single-sided strips (perforated)** | 26 | 27 |
| **Single-sided strips (solid)** | 15 | 23 |
| **Double-sided strips (perforated)** | 20 | 27 |
| **Double-sided strips (solid)** | 14 | 16 |
| **Interproximal Discs (perforated)** | 4 | 7 |
| **Interproximal Discs (solid)** | 2 | 3 |
| **High speed burs** | 3 | 12 |
| **12.Preferred method for 0.3-0.5mm IPR** | **Single-sided strips** | 20 | 24 |
| **Double-sided strips** | 34 | 35 |
| **Interproximal Discs** | 14 | 17 |
| **Burs** | 16 | 35 |
| **13.Staging IPR when undertaking 0.3-0.5mm** | **Yes** | 20 | 29 |
| **No** | 3 | 7 |
| **It depends** | 22 | 19 |

**Table 9.** Preferred method of retention in CAT (n= 100)

| **Domains** | **Answers** | **1-10 years qualified**  **(n=45)** | **>10 years qualified**  **(n=55)** |
| --- | --- | --- | --- |
| **1.Provision of fixed retainers at the end of CAT** | **1-25%** | 19 | 14 |
| **26-75%** | 13 | 19 |
| **More than 75%** | 9 | 14 |
| **100%** | 4 | 8 |
| **2.Provision of fixed retainers for the lower anterior teeth** | **Yes** | 33 | 46 |
| **No** | 12 | 9 |
| **3.Provision of fixed retainers for the upper anterior teeth** | **Yes** | 33 | 41 |
| **No** | 12 | 14 |
| **4.Provision of removable retainers at the end of CAT** | **1-25%** | 1 | 1 |
| **26-75%** | 1 | 1 |
| **More than 75%** | 3 | 4 |
| **100%** | 40 | 49 |
| **5.Provision of BOTH fixed and removable retainers at the end of CAT** | **1-25%** | 17 | 13 |
| **26-75%** | 13 | 21 |
| **More than 75%** | 10 | 14 |
| **100%** | 5 | 7 |
| **6.Fixed retainers prefabricated in laboratory** | **Always** | 24 | 31 |
| **Sometimes** | 11 | 11 |
| **Never** | 10 | 13 |
