# Supplementary material for: The provision of clear aligner treatment by general dental practitioners in England: a mixed-methods study
Source: Research Square preprint supplement (doi:10.21203/rs.3.rs-7509774/v1), 2025-09-17

**Supplementary Figure 1. Illustrates intra-oral photographs of 7 different occlusal traits (1a-g).**

**
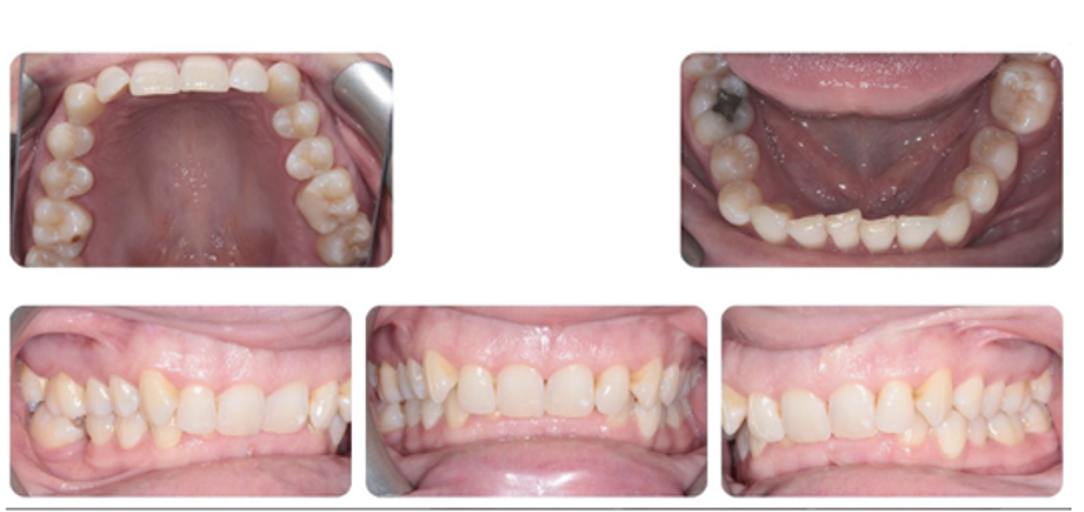
Clinical Case 1a**

**
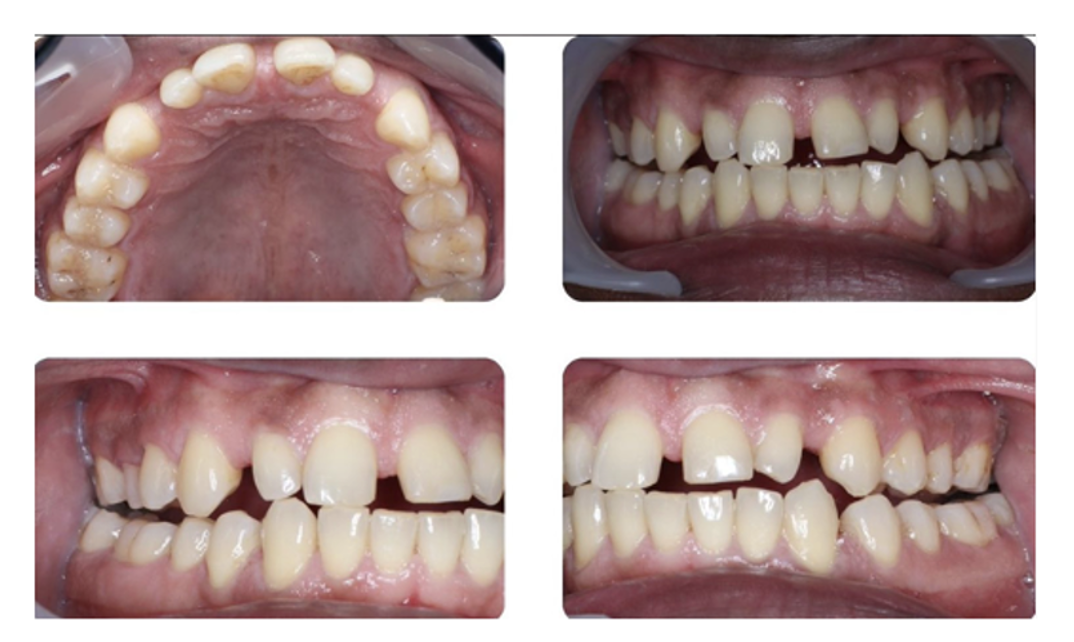
Clinical Case 1b**

**Clinical Case 1c**


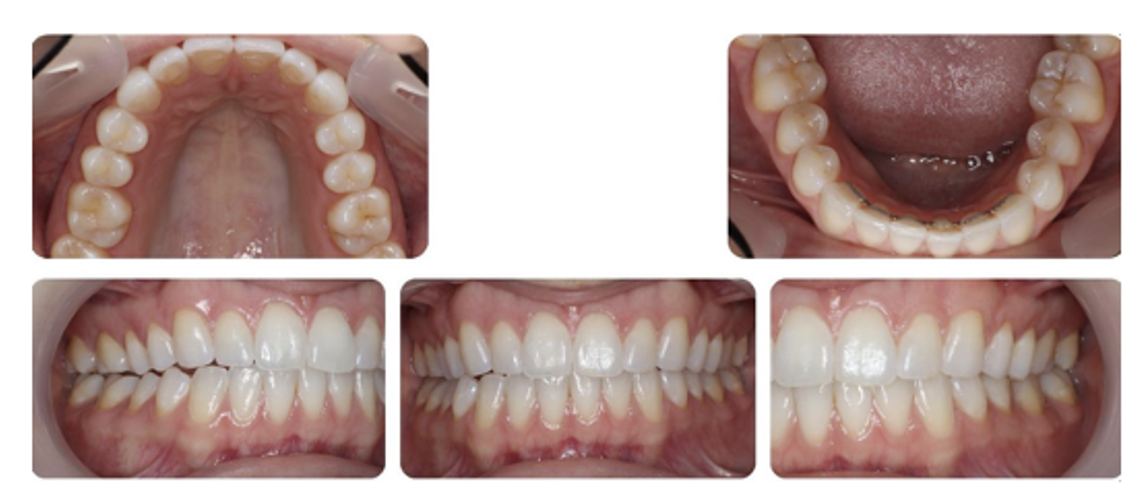


**
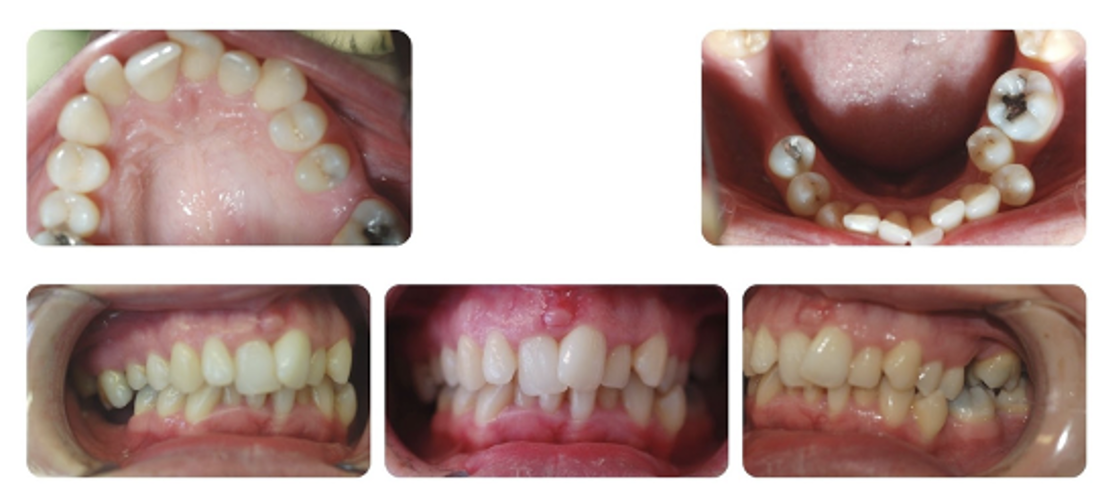
Clinical Case 1d**

**Clinical Case 1e**


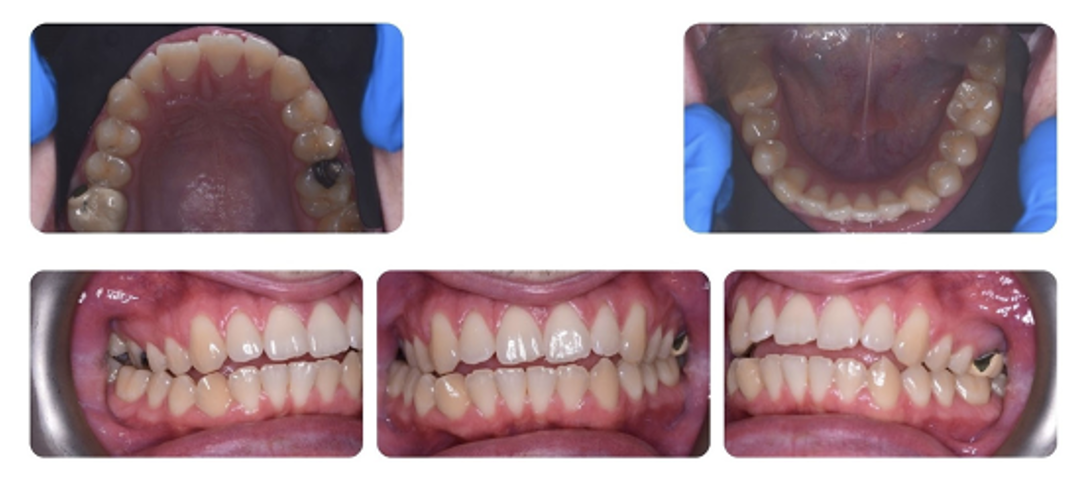


**
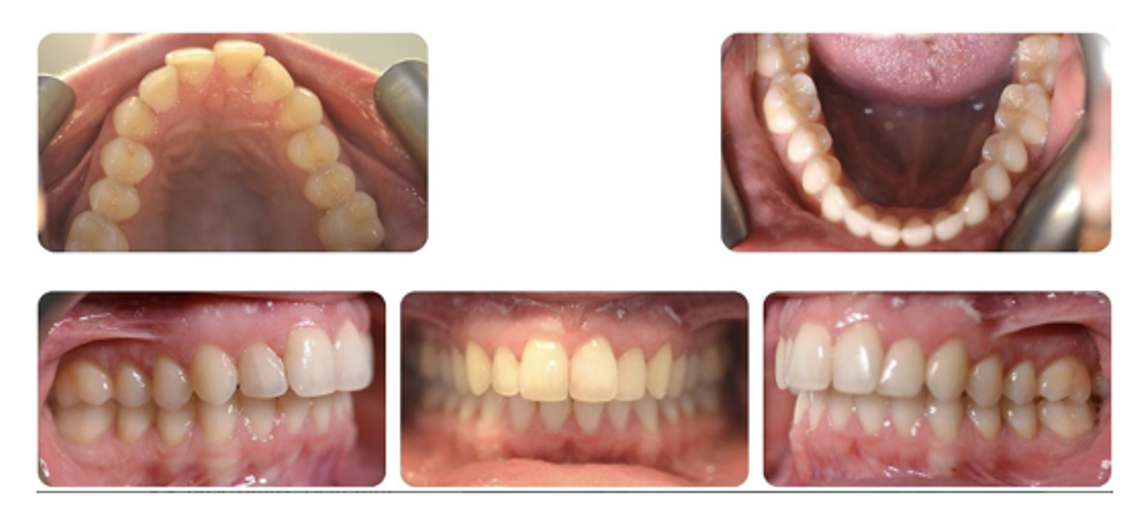
Clinical Case 1f**

**Clinical Case 1g**


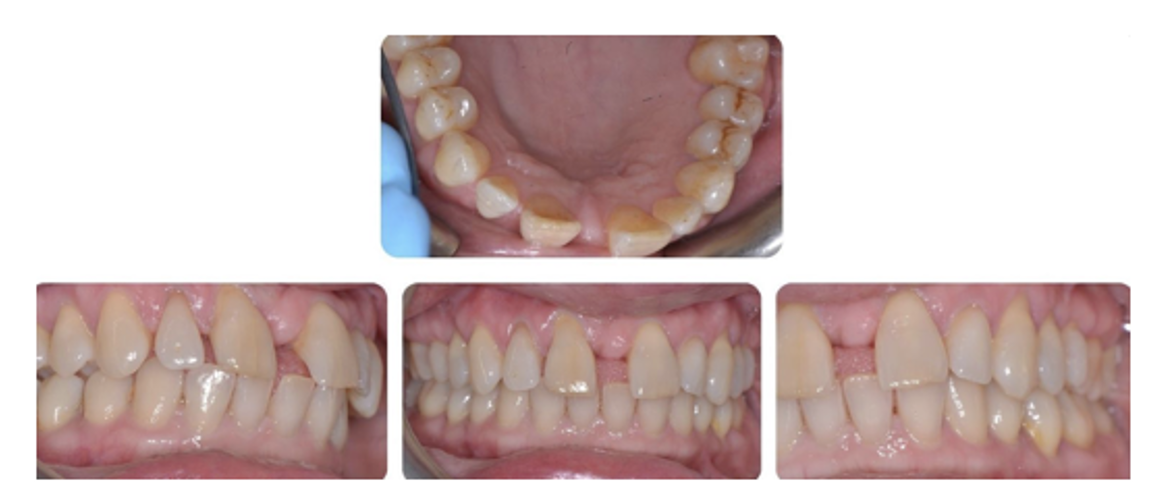

Supplement: Supplementary file 2 [file c3bec6967f9f88a95373bd7c.docx]
